# Supplementary material for: Ribosome biogenesis is a downstream effector of the oncogenic U2AF1-S34F mutation
Source: PubMed Central journal article supplement (PMC7660540; doi:10.1371/journal.pbio.3000920), 2020-11-02

Fig. 2C:

NPM1:

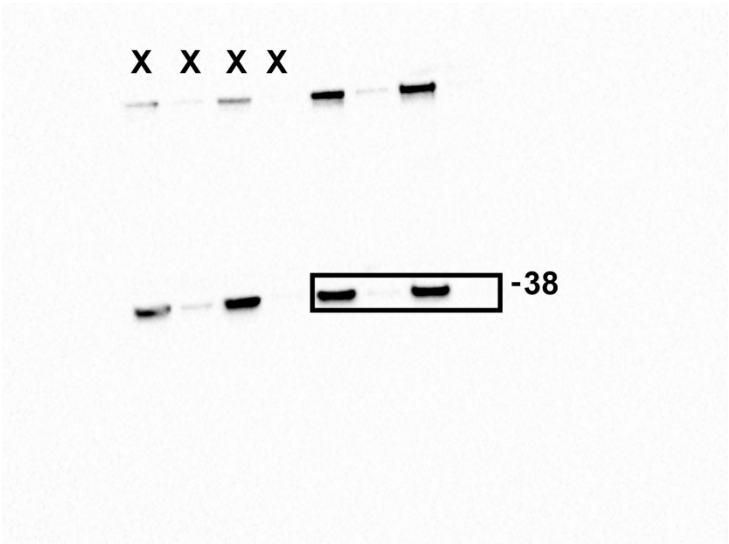

Actin:

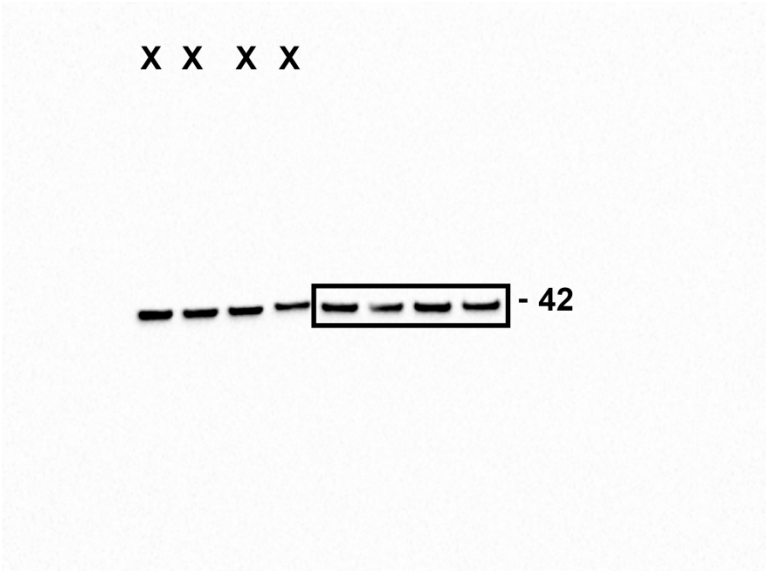

Fig 2F:

NPM1:

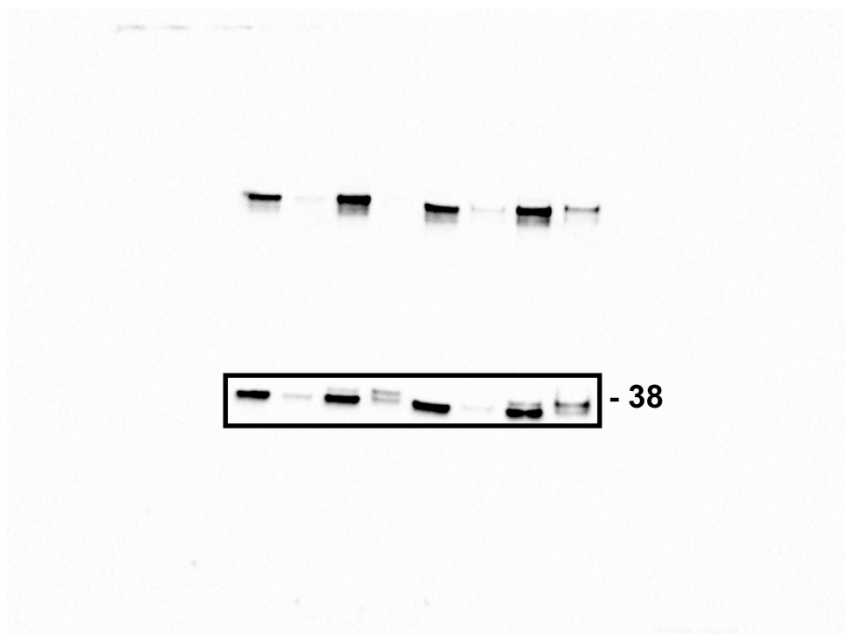

Actin:

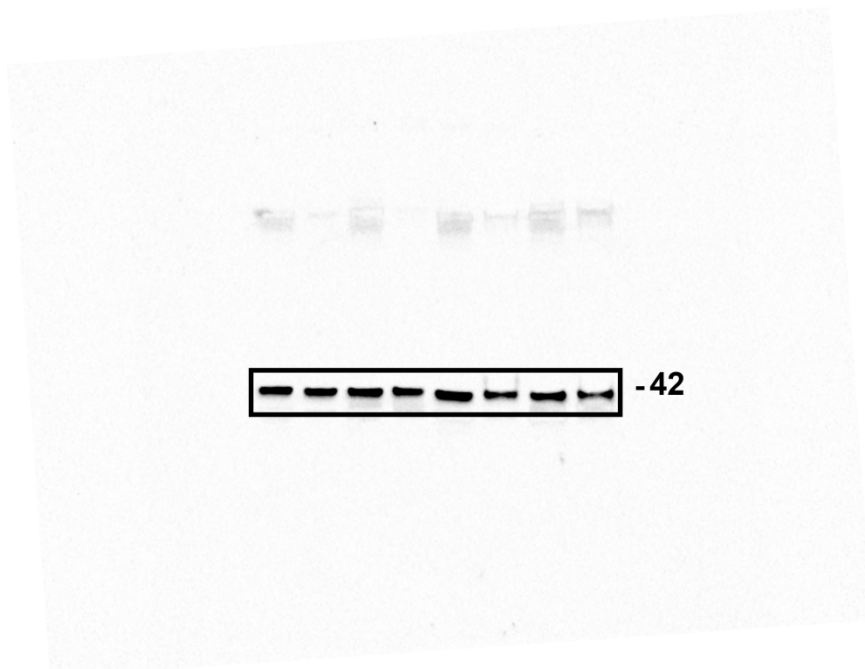

Fig 2H:

IPO7:

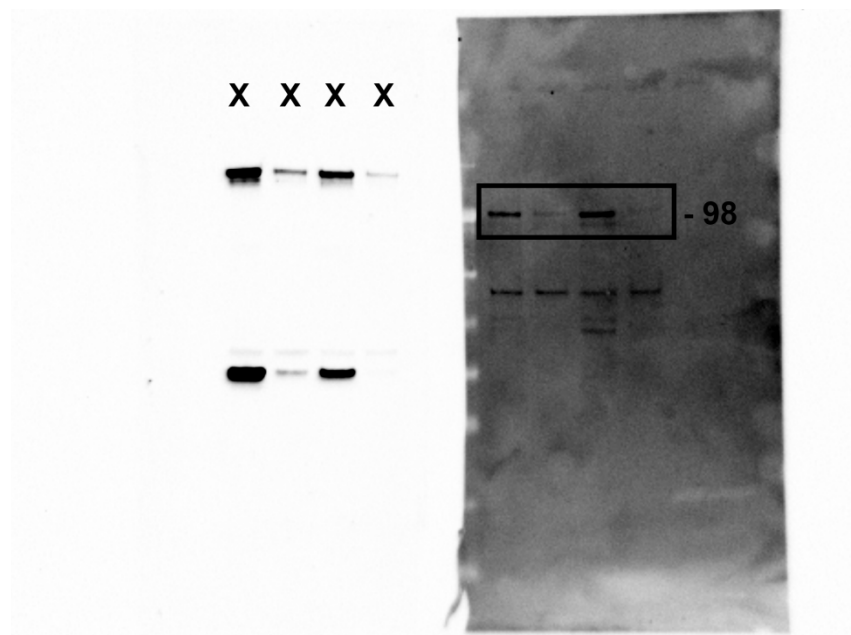

Actin:

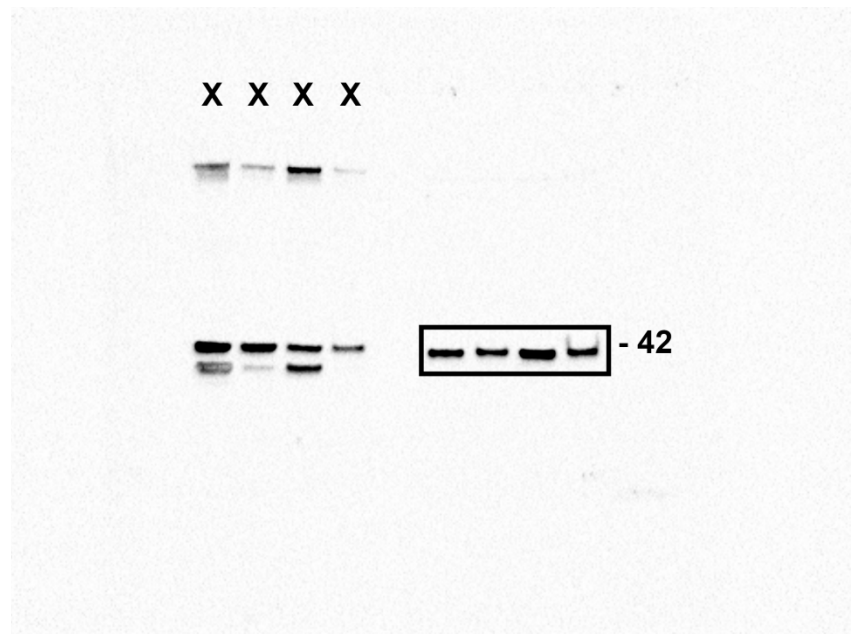

Fig. 2J:

RBM10:

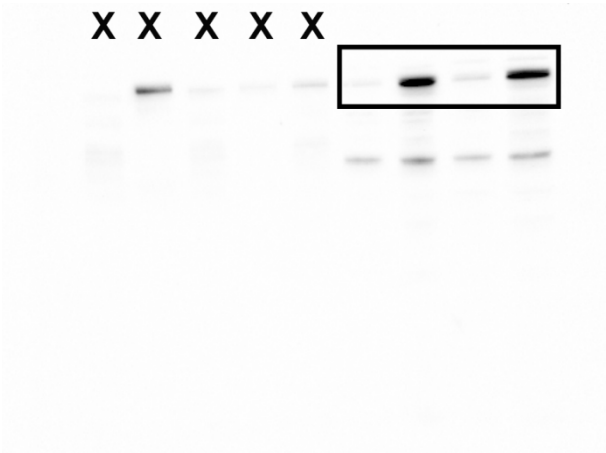

Tubulin:

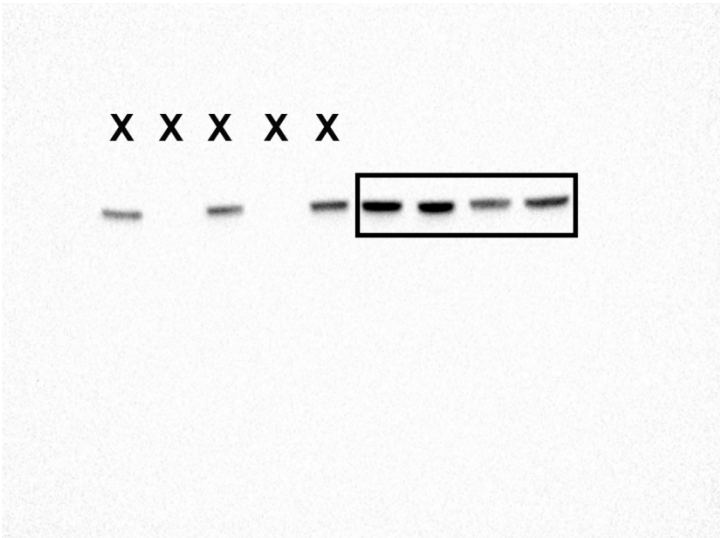

Fig 3A:

NPM1:

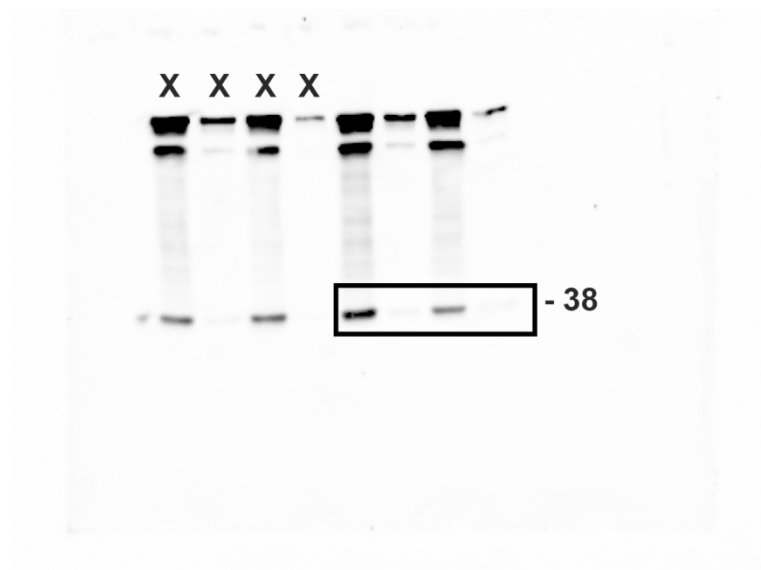

Tubulin:

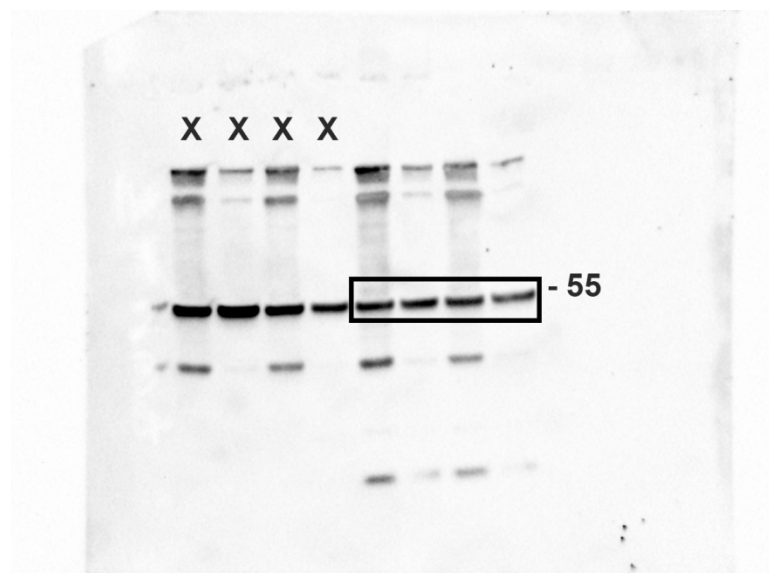

p53:

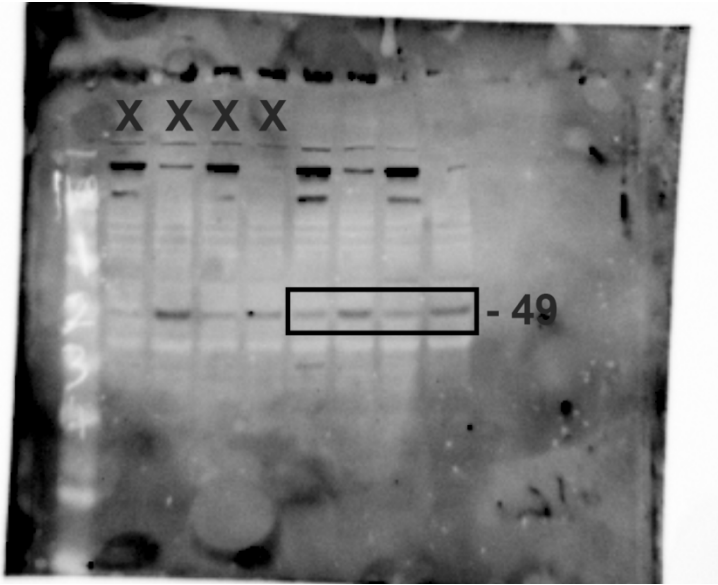

Fig. 3D:

NPM1:

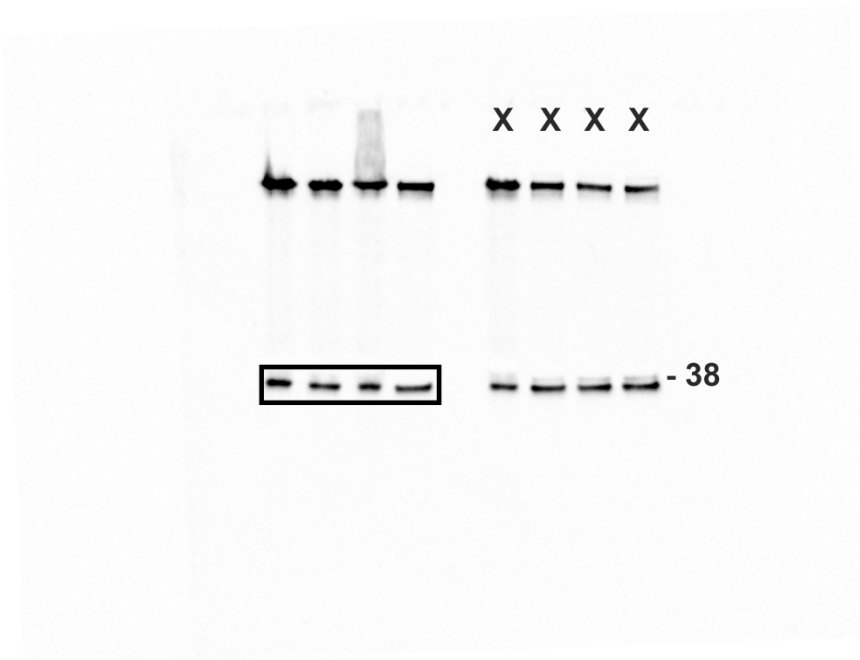

Actin:

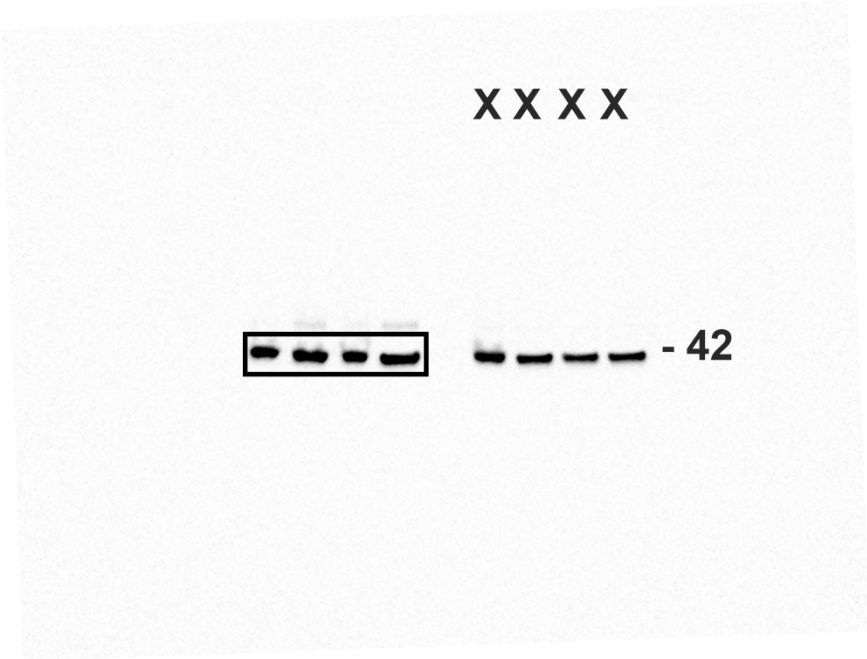

p53:

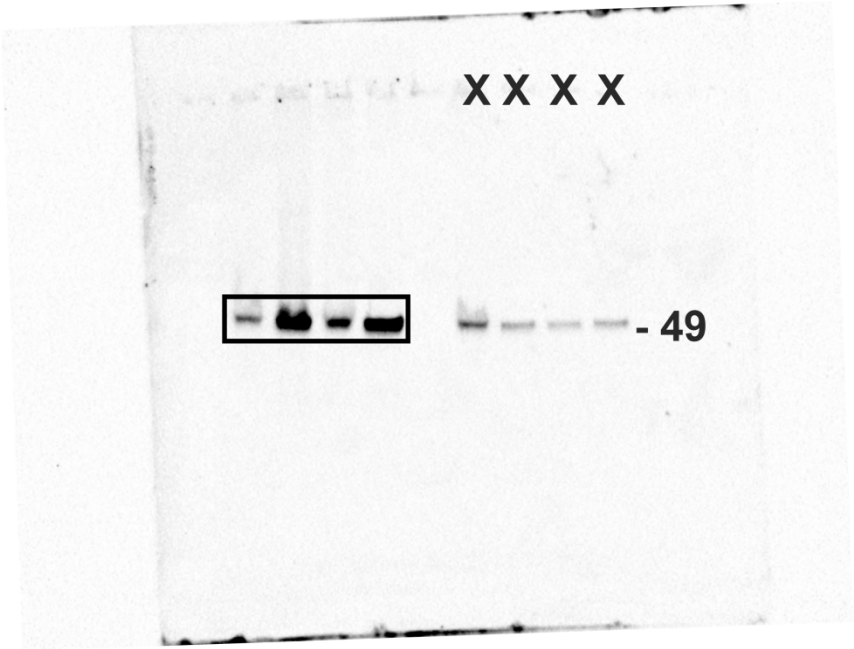

Fig. 4E:

NPM1:

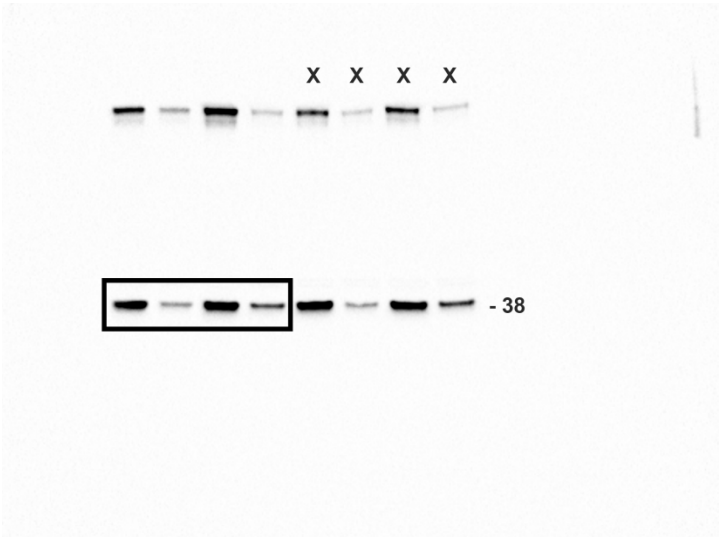

Actin:

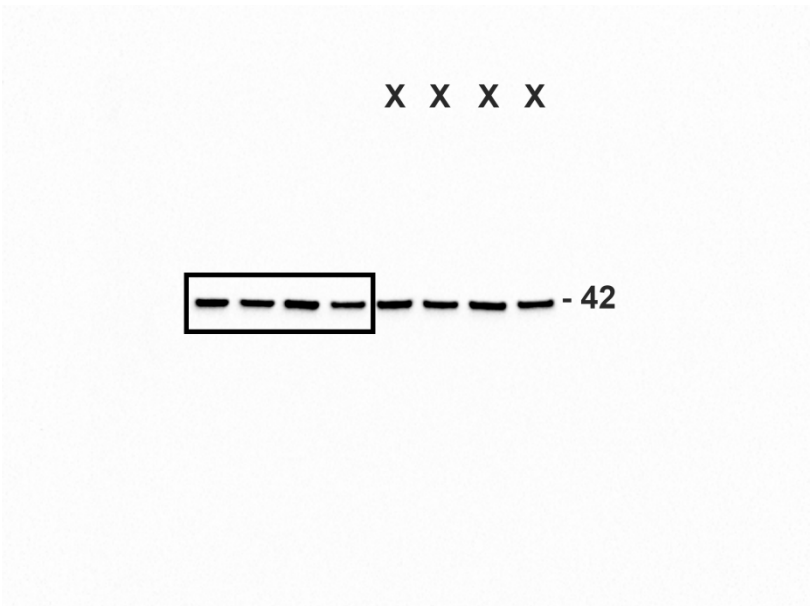

Cyclin A2:



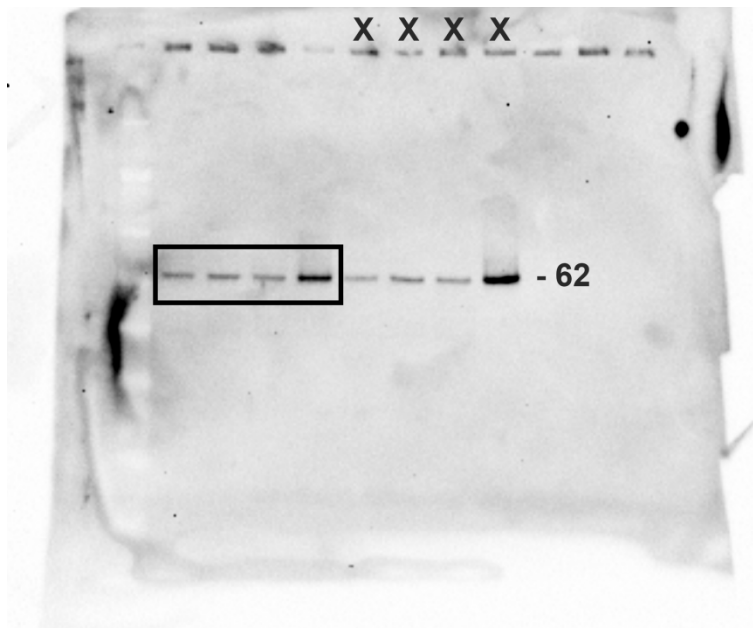

Fig. 4F:

IPO7:

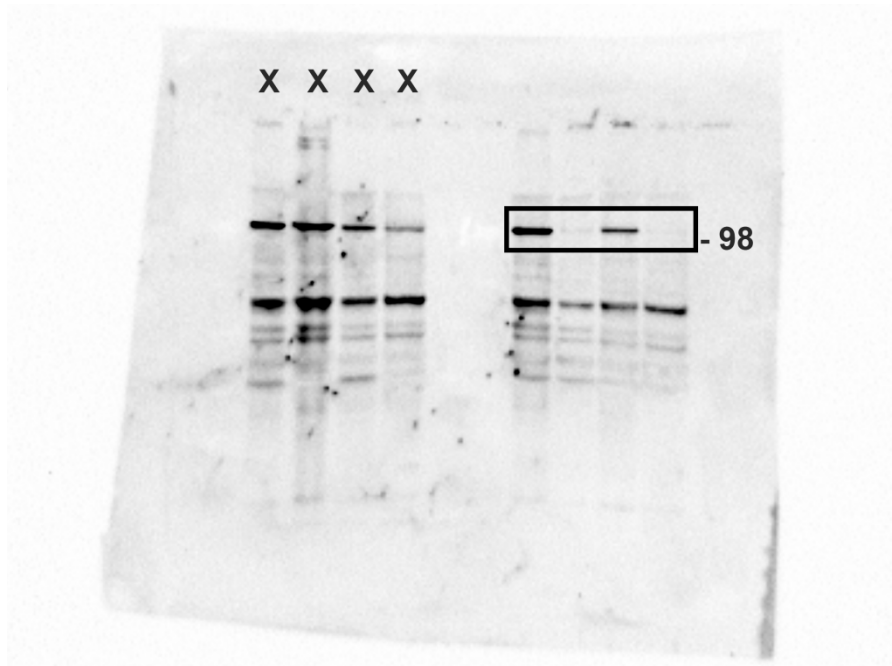

Actin:

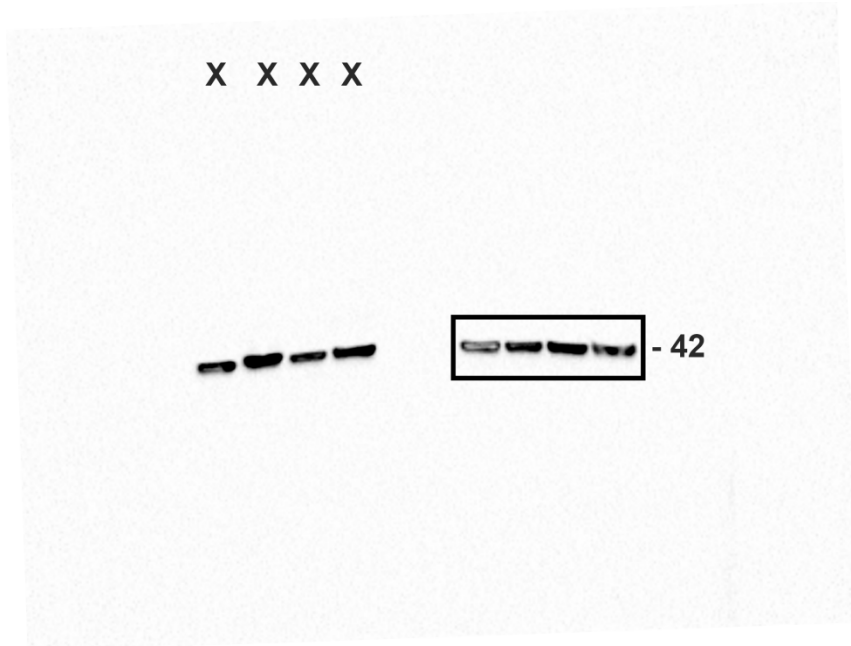

Cyclin A2:

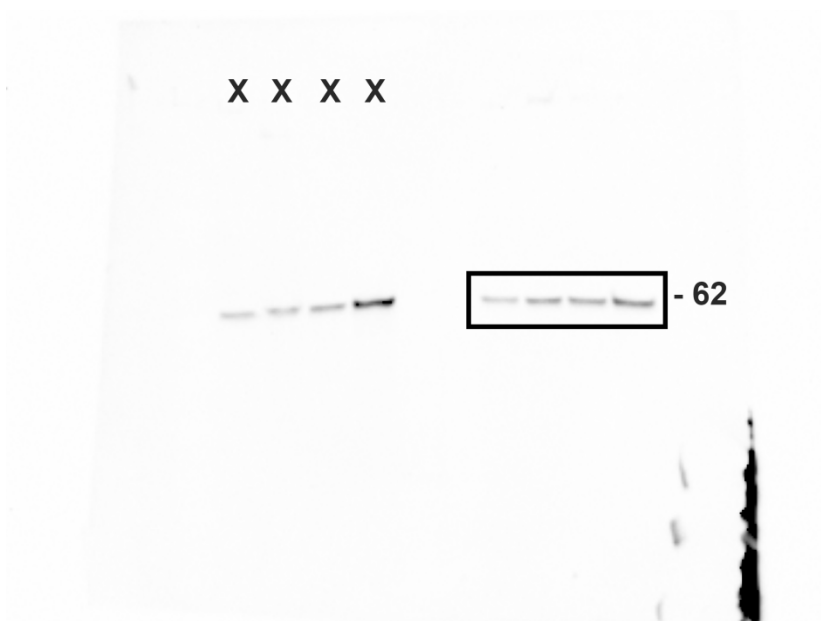

Fig. 5B:

ITS2:

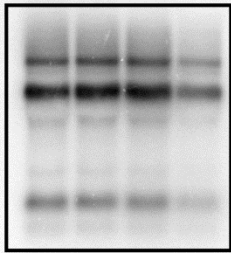

X X X X

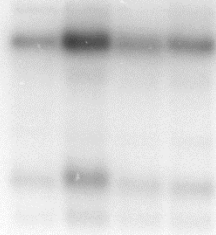

GAPDH:

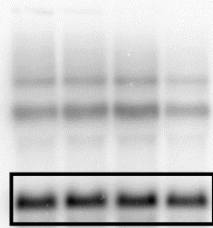

X X X X

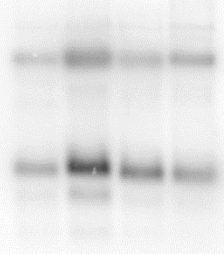

Ethidium Bromide (zoom-in high exposure uncropped image of only top half of gel):

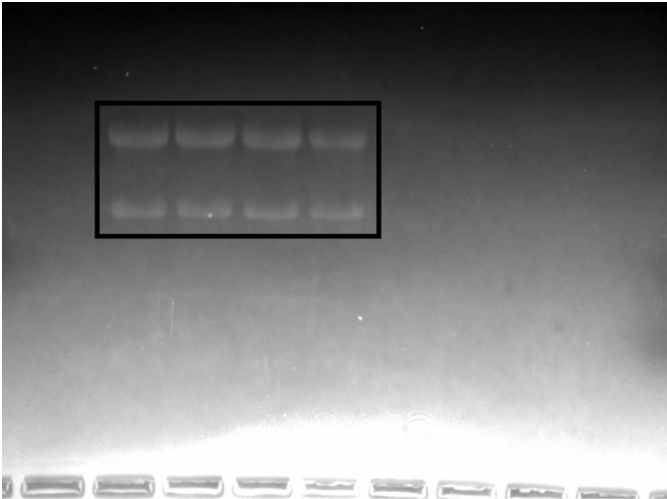

Ethidium bromide (zoom-out low exposure uncropped image of whole gel):

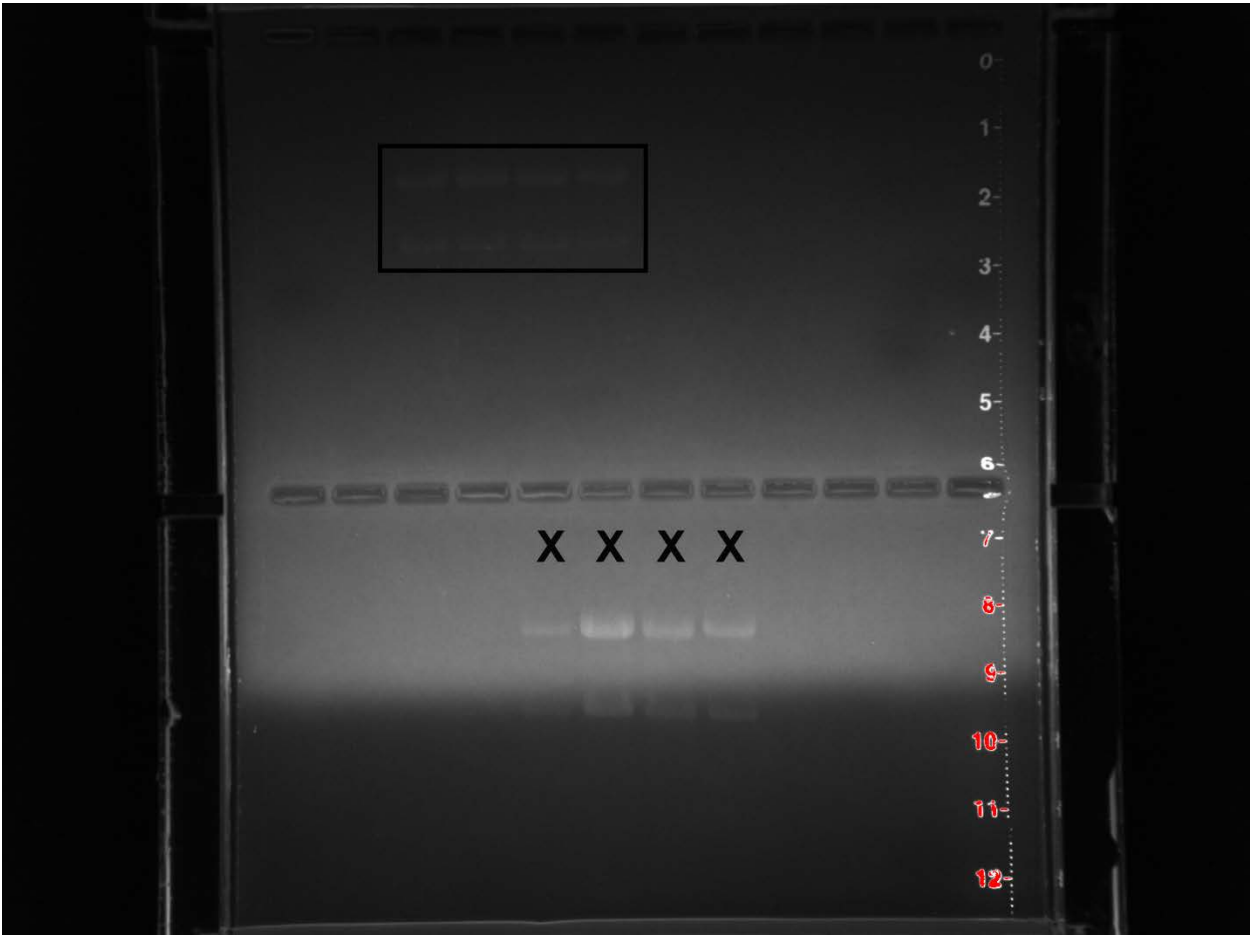

Fig. 5C:

ITS2:



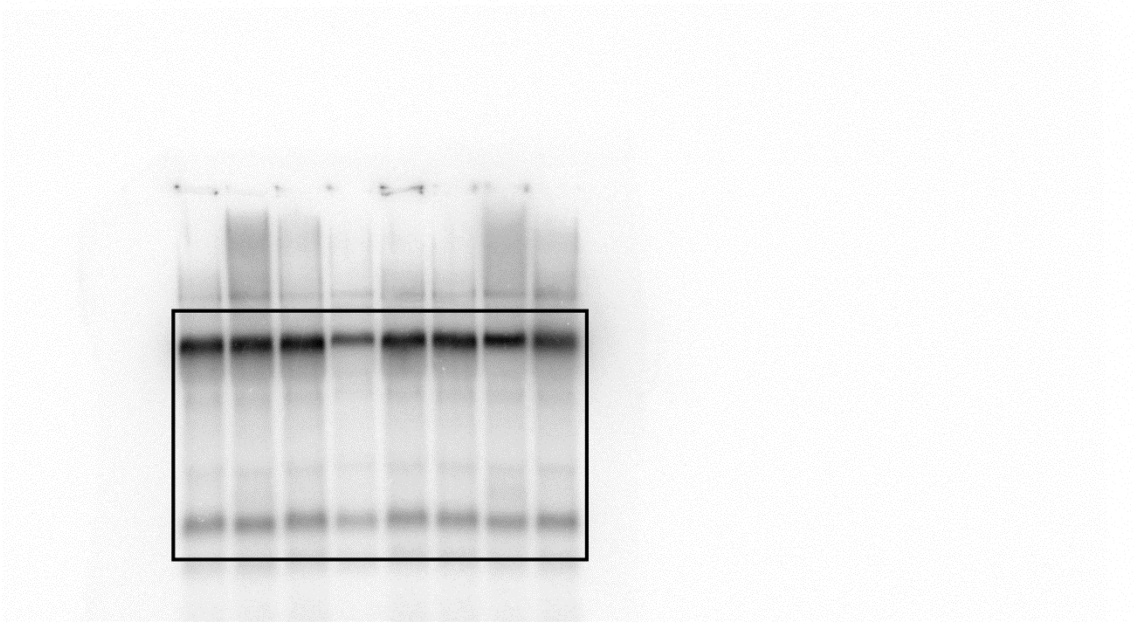

GAPDH:

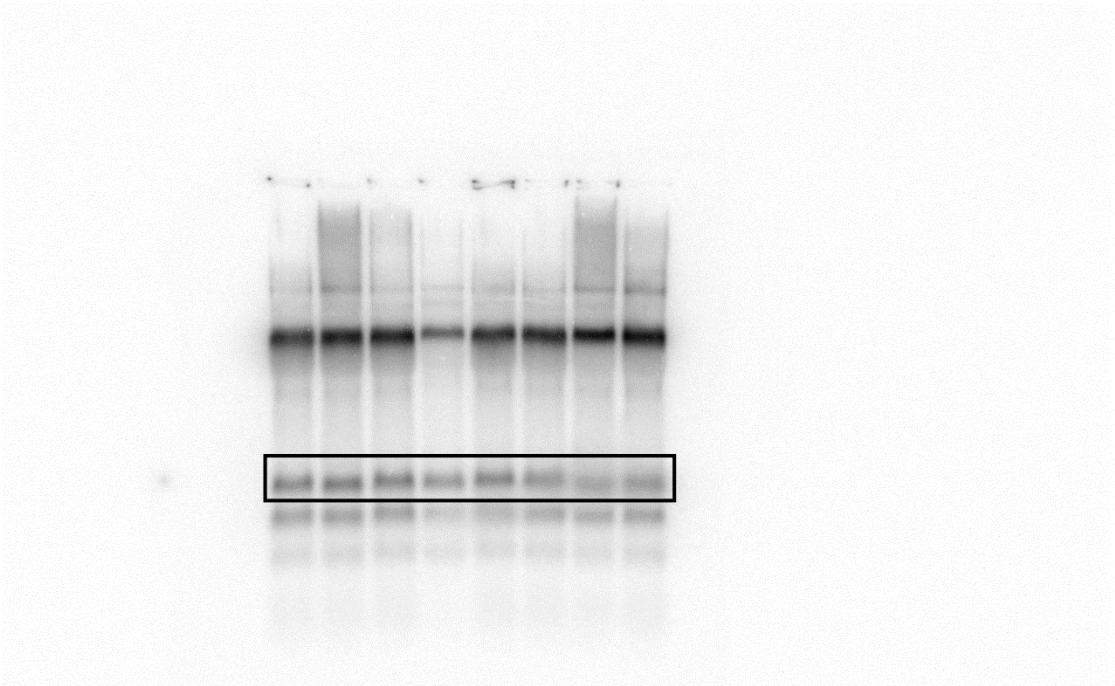

Ethidium Bromide:

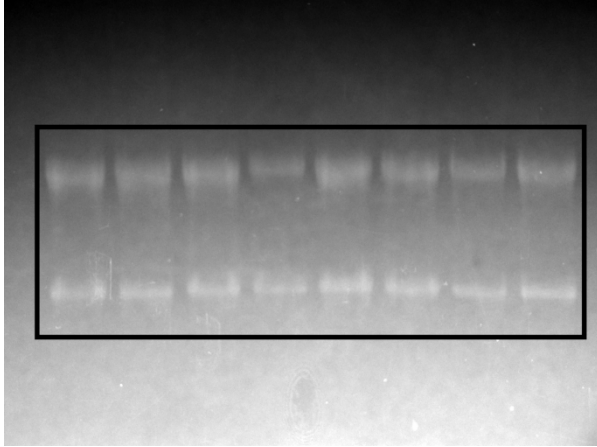

Fig. 5D:

5'-ETS:

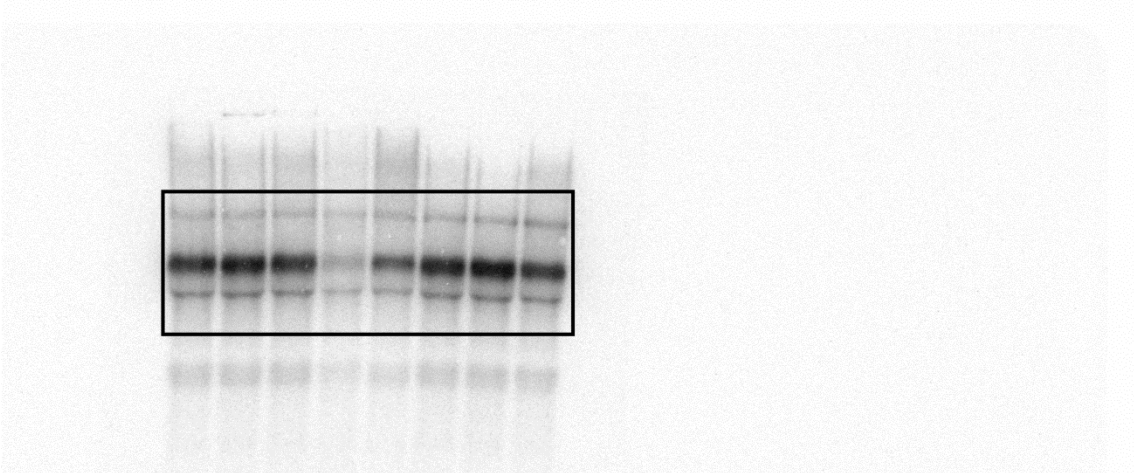

GAPDH:

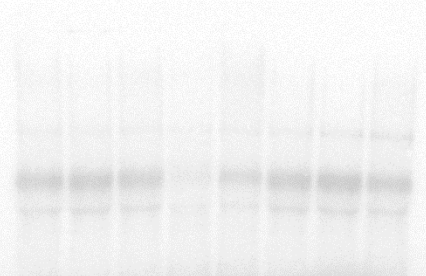

Blank Blank Blank Blank Blank Blank Blank

Ethidium Bromide:

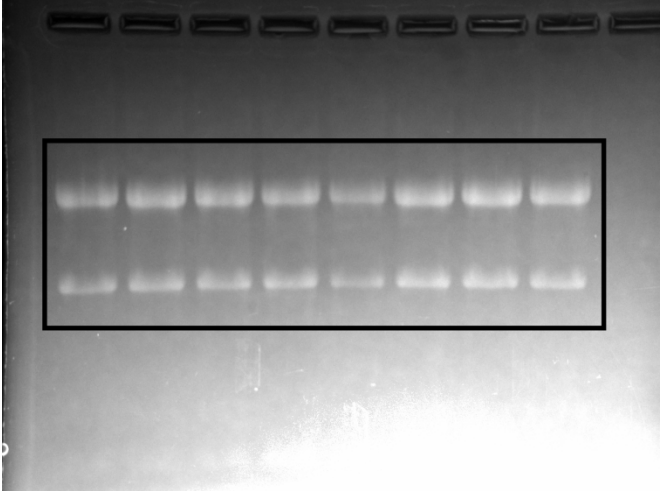



S4 Fig:

puromycin

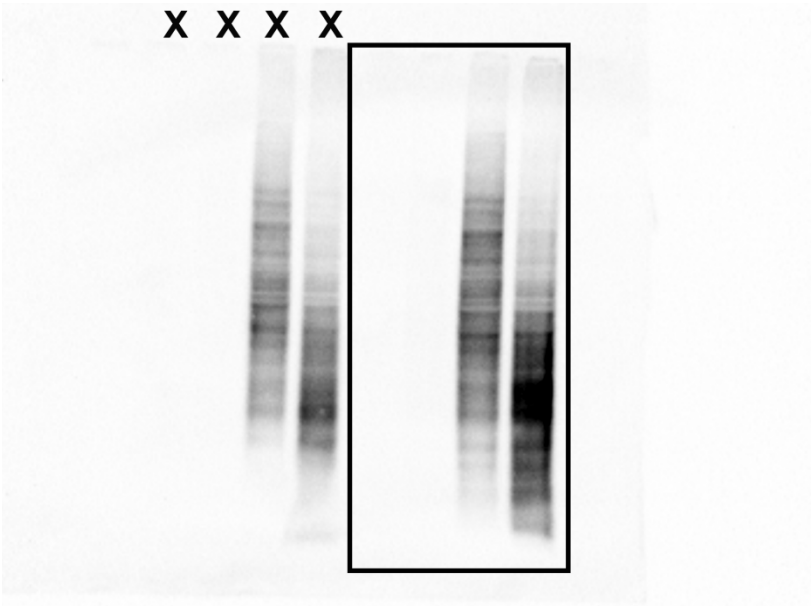

Actin

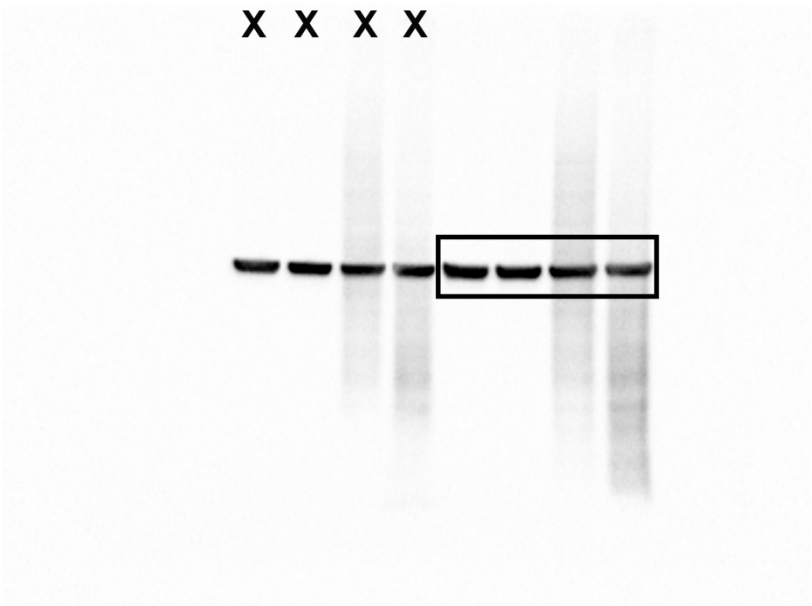

Supplement: pbio.3000920.s014.pdf [file pbio.3000920.s014.pdf]
